# Supplementary material for: Bacteriophage Cocktails in the Post-COVID Rehabilitation
Source: MDPI journal article supplement (doi:10.3390/v14122614), 2022-11-23
Supplement: s1 [file s1]

**Table S2.** CT lung volume assessment in subjects on bacteriophage therapy (BPh).

| ID | Retrospective Data<br><br>CT scan lung damage (%) | After Bhp (10–14 days) |                     |                   |                        |                      |                         |                       |
|----|---------------------------------------------------|------------------------|---------------------|-------------------|------------------------|----------------------|-------------------------|-----------------------|
|    |                                                   | Lung damage (%)        | Lung capacity (cm3) | Lung damage (cm3) | Left lung damage (cm3) | Left lung damage (%) | Right lung damage (cm3) | Right lung damage (%) |
| 1  | 20                                                | 9                      | 5148                | 461               | 196                    | 8                    | 265                     | 11                    |
| 2  | 25                                                | 11                     | 3759                | 400               | 226                    | 13                   | 174                     | 9                     |
| 3  | 5                                                 | 1                      | 4276                | 60                | 32                     | 2                    | 29                      | 1                     |
| 4  | 10                                                | 1                      | 4668                | 40                | 16                     | 1                    | 24                      | 1                     |
| 5  | 40                                                | 2                      | 6246                | 101               | 53                     | 2                    | 54                      | 2                     |
| 6  | 10                                                | 2                      | 6283                | 142               | 63                     | 2                    | 79                      | 3                     |
| 7  | 20                                                | 1                      | 4609                | 47                | 19                     | 1                    | 27                      | 1                     |
| 8  | 80                                                | 30                     | 2700                | 783               | 418                    | 33                   | 366                     | 26                    |
| 9  | 40                                                | 1                      | 6153                | 59                | 25                     | 1                    | 34                      | 1                     |
| 10 | 25                                                | 6                      | 3229                | 179               | 62                     | 4                    | 117                     | 7                     |
| 11 | 44                                                | 2                      | 6130                | 138               | 63                     | 2                    | 76                      | 2                     |
| 12 | 60                                                | 14                     | 3531                | 494               | 209                    | 13                   | 285                     | 15                    |
| 13 | 25                                                | 8                      | 4702                | 390               | 265                    | 13                   | 125                     | 5                     |
| 14 | 75                                                | 42                     | 3624                | 1475              | 703                    | 43                   | 772                     | 41                    |
| 15 | 25                                                | 4                      | 3607                | 126               | 59                     | 4                    | 67                      | 4                     |
| 16 | 20                                                | 1                      | 4512                | 34                | 20                     | 1                    | 14                      | 1                     |
| 17 | 15                                                | 1                      | 8016                | 117               | 65                     | 1                    | 52                      | 1                     |
| 18 | 10                                                | 3                      | 6979                | 232               | 80                     | 2                    | 153                     | 5                     |
| 19 | 15                                                | 5                      | 6535                | 303               | 121                    | 4                    | 183                     | 6                     |
| 20 | 68                                                | 26%                    | 3220                | 800               | 436                    | 22                   | 364                     | 31                    |
