# Supplementary material for: Bacteriophage Cocktails in the Post-COVID Rehabilitation
Source: MDPI journal article supplement (doi:10.3390/v14122614), 2022-11-23
Supplement: s1 [file s1]

**Table S1.** Clinical and laboratory parameters in the control group. Data are presented as median and interquartile range (IQR).

| Parameters                    | Control group<br>Me (IQR) |                  | p-value                                | p-value<br>Mann-Whitney test      |                                  |
|-------------------------------|---------------------------|------------------|----------------------------------------|-----------------------------------|----------------------------------|
|                               | Before<br>n = 8           | After<br>n = 8   | Wilcoxon<br>test<br>Before<br>VS After | Bph vs<br>control<br>group Before | Bph vs<br>control<br>group After |
| Saturation, percent           | 98 (97–98)                | 97 (97–99)       | 0,999                                  | 0,001*                            | 0,019*                           |
| Respiratory rate              | 17 (16–18)                | 16 (16–17)       | 0,102                                  | <0,001*                           | 0,297                            |
| Heart rate,                   | 76 (72–85)                | 77 (70–85)       | 0,999                                  | 0,820                             | 0,050                            |
| Bilirubin, $\mu\text{mol/l}$  | 99 (7.0–17.2)             | 10.9 (7.5–14.4)  | 0.674                                  | 0.162                             | 0.254                            |
| Total protein,g/l             | 73 (67.6–<br>75.6)        | 72,3 (70.7–73.5) | 0.327                                  | 0.074                             | 0.374                            |
| Creatinine, $\mu\text{mol/l}$ | 84 (81–92)                | 88 (80–94)       | 0.484                                  | 0.853                             | 0.789                            |
| Glucose, mmol/l               | 5.0 (4.8–5.3)             | 5.1 (4.7–5.9)    | 0.208                                  | 0.017*                            | 0.138                            |

|                                     |                                                                  |                                                               |        |        |        |
|-------------------------------------|------------------------------------------------------------------|---------------------------------------------------------------|--------|--------|--------|
| Cholesterol, mmol/l                 | 5.36 (4.33–6.00)                                                 | 4.86 (3.95–5.45)                                              | 0.069  | 0.606  | 0.204  |
| Lactate dehydrogenase, u/l          | 165 (154–190)                                                    | 169 (156–197)                                                 | 0.327  | 0.124  | 0.098  |
| Alanine aminotransferase, u/l       | 15.2 (13.1–22.7)                                                 | 16.4 (12.6–24.6)                                              | 0.484  | 0.113  | 0.150  |
| Aspartate aminotransferase, u/l     | 20.0 (18.9–22.8)                                                 | 21.6 (19.1–33.5)                                              | 0.123  | 0.334  | 0.821  |
| C-reactive protein, mg/l            | 0.1 (0.1–0.8)                                                    | 0.75 (0.63–0.88)                                              | 0.021* | 0.190  | 0.009* |
| Total bacterial mass                | $4 \cdot 10^{13}$<br>( $2 \cdot 10^{13}$ – $1.6 \cdot 10^{14}$ ) | $1.5 \cdot 10^{13}$ ( $8 \cdot 10^{12}$ – $2 \cdot 10^{13}$ ) | 0.035* | 0.611  | 0.237  |
| <i>Lactobacillus spp.</i>           | $6 \cdot 10^6$ ( $1 \cdot 10^5$ – $1 \cdot 10^8$ )               | $7.5 \cdot 10^6$ ( $1 \cdot 10^6$ – $6 \cdot 10^7$ )          | 0.575  | 0.707  | 0.237  |
| <i>Bifidobacterium spp.</i>         | $4.5 \cdot 10^{10}$<br>( $9 \cdot 10^9$ – $2 \cdot 10^{11}$ )    | $1.5 \cdot 10^{10}$ ( $1.5 \cdot 10^9$ – $7 \cdot 10^{10}$ )  | 0.058  | 0.411  | 0.674  |
| <i>Escherichia coli</i>             | $3.5 \cdot 10^8$<br>( $6 \cdot 10^7$ – $1 \cdot 10^9$ )          | $4.5 \cdot 10^7$ ( $2.5 \cdot 10^6$ – $2 \cdot 10^8$ )        | 0.012* | 0.674  | 0.295  |
| <i>Bacteroides spp.</i>             | $4 \cdot 10^{13}$<br>( $2 \cdot 10^{13}$ – $1 \cdot 10^{14}$ )   | $1.5 \cdot 10^{13}$ ( $8 \cdot 10^{12}$ – $2 \cdot 10^{13}$ ) | 0.035* | 0.611  | 0.237  |
| <i>Faecalibacterium prausnitzii</i> | $5 \cdot 10^{11}$<br>( $4 \cdot 10^{11}$ – $4 \cdot 10^{12}$ )   | $1.5 \cdot 10^{11}$ ( $5 \cdot 10^{10}$ – $3 \cdot 10^{11}$ ) | 0.017* | 0.006* | 0.947  |
| <i>Klebsiella pneumoniae</i>        | -                                                                | -                                                             | -      | -      | -      |
| <i>Klebsiella oxytoca</i>           | -                                                                | -                                                             | -      | -      | -      |

|                                                                                 |                                                                   |                                                             |       |       |       |
|---------------------------------------------------------------------------------|-------------------------------------------------------------------|-------------------------------------------------------------|-------|-------|-------|
| <i>Candida spp.</i>                                                             | 7*10 <sup>5</sup> (7*10 <sup>5</sup> –7*10 <sup>5</sup> )         | -                                                           | -     | 0.999 | -     |
| <i>Staphylococcus aureus</i>                                                    | 4*10 <sup>6</sup> (3*10 <sup>5</sup> –4*10 <sup>6</sup> )         | 5*10 <sup>6</sup> (1*10 <sup>6</sup> –5*10 <sup>6</sup> )   | 0.655 | 0.262 | 0.183 |
| <i>Enterococcus spp.</i>                                                        | -                                                                 | -                                                           | -     | -     | -     |
| <i>Bacteroides thetaiotaomicron</i>                                             | 3,4*10 <sup>9</sup><br>(8*10 <sup>7</sup> –1.1*10 <sup>10</sup> ) | 2*10 <sup>9</sup> (1*10 <sup>8</sup> –4*10 <sup>9</sup> )   | 0.173 | 0.590 | 0.664 |
| <i>Akkermansia muciniphila</i>                                                  | -                                                                 | 1.5*10 <sup>8</sup> (1*10 <sup>8</sup> –2*10 <sup>8</sup> ) | -     | -     | 0.533 |
| <i>Clostridium difficile</i>                                                    | -                                                                 | -                                                           | -     | -     | -     |
| <i>Clostridium perfringens</i>                                                  | -                                                                 | -                                                           | -     | -     | -     |
| <i>Proteus spp.</i>                                                             | 2*10 <sup>9</sup> (2*10 <sup>9</sup> –2*10 <sup>9</sup> )         | -                                                           | -     | 0.500 | -     |
| <i>Enterobacter spp.</i>                                                        | 1*10 <sup>8</sup> (5*10 <sup>6</sup> –2*10 <sup>10</sup> )        | 4*10 <sup>7</sup> (8*10 <sup>6</sup> –1*10 <sup>9</sup> )   | 0.600 | 0.078 | 0.288 |
| <i>Citrobacter spp.</i>                                                         | -                                                                 | -                                                           | -     | -     | -     |
| <i>Fusobacterium nucleatum,</i>                                                 | 7.5*10 <sup>6</sup><br>(5*10 <sup>6</sup> –7.5*10 <sup>6</sup> )  | 3*10 <sup>5</sup> (3*10 <sup>5</sup> –3*10 <sup>5</sup> )   | -     | 0.133 | 0.580 |
| <i>Parvimonas micra</i>                                                         | -                                                                 | -                                                           | -     | -     | -     |
| Ratio <i>Bacteroides fragilis</i> group/<br><i>Faecalibacterium prausnitzii</i> | 100 (37–779)                                                      | 163 (100–200)                                               | 1.000 | 0.172 | 0.999 |
| hemoglobin, g/L                                                                 | 137 (116;150)                                                     | 130 (117;154)                                               | 0.889 | 0.452 | 0.169 |

|                                               |                 |                 |       |       |       |
|-----------------------------------------------|-----------------|-----------------|-------|-------|-------|
| White blood cells, 10 <sup>9</sup> /l         | 5.4 (5.1–5.8)   | 5.5 (4.8–5.9)   | 0.735 | 0.463 | 0.514 |
| Erythrocyte Sedimentation Rate (ESR), mm/hour | 14.0 (8.0–25.0) | 12.5 (6.0–20.3) | 0.362 | 0.563 | 0.950 |
